# Supplementary material for: Optimal Conspicuity of Liver Metastases in Virtual Monochromatic Imaging Reconstructions on a Novel Photon-Counting Detector CT—Effect of keV Settings and BMI
Source: MDPI journal article supplement (doi:10.3390/diagnostics12051231), 2022-05-14
Supplement: s1 [file s1]

**Supplemental Table S2 Median image noise at different keV levels**

|     | PCD-CT            | EID-CT           | P-Value |
|-----|-------------------|------------------|---------|
| keV | Noise (median SD) |                  |         |
| 40  | 30.6 (24.5-36.2)  | 17.6 (13.8-21.5) | <0.001  |
| 45  | 27.2 (21.8-32.2)  |                  | <0.001  |
| 50  | 24.5 (19.7-28.8)  |                  | <0.001  |
| 55  | 22.2 (18.0-25.9)  |                  | <0.001  |
| 60  | 20.2 (16.6-23.7)  |                  | <0.001  |
| 70  | 16.6 (13.8-19.1)  |                  | <0.001  |
| 80  | 15.3 (13.0-17.4)  |                  | <0.001  |
| 90  | 14.7 (12.6-16.8)  |                  | <0.001  |
| 100 | 14.5 (12.5-16.7)  |                  | <0.001  |
| 110 | 14.4 (12.4-16.5)  |                  | <0.001  |
| 130 | 14.4 (12.3-16.5)  |                  | <0.001  |
| 150 | 14.3 (12.2-16.4)  |                  | <0.001  |
| 170 | 14.3 (12.2-16.4)  |                  | <0.001  |
| 190 | 14.3 (12.2-16.4)  |                  | <0.001  |

Median of all measured SD's. Data shown as median (interquartile range), P-Value < 0.0035 shown in *italics*
