# Supplementary material for: Optimal Conspicuity of Liver Metastases in Virtual Monochromatic Imaging Reconstructions on a Novel Photon-Counting Detector CT—Effect of keV Settings and BMI
Source: MDPI journal article supplement (doi:10.3390/diagnostics12051231), 2022-05-14
Supplement: s1 [file s1]

**Supplemental Table S3 Median image noise at different keV levels, divided into two groups (according to BMI)**

|     | PCD-CT                      |                          |                  | EID-CT                      |                          |                  |
|-----|-----------------------------|--------------------------|------------------|-----------------------------|--------------------------|------------------|
| keV | Noise (median SD)           |                          | P-Value          | Noise (median SD)           |                          | P-Value          |
|     | $\leq 23.88 \text{ kg/m}^2$ | $> 23.88 \text{ kg/m}^2$ |                  | $\leq 23.88 \text{ kg/m}^2$ | $> 23.88 \text{ kg/m}^2$ |                  |
| 40  | 29.5 (23.7-34.7)            | 32.3 (26.8-38.2)         | <i>&lt;0.001</i> | 16.6 (13.1-20.3)            | 18.6 (14.4-22.8)         | <i>&lt;0.001</i> |
| 45  | 26.2 (21.2-30.9)            | 28.5 (23.8-33.2)         | <i>&lt;0.001</i> |                             |                          |                  |
| 50  | 23.4 (19.3-27.3)            | 25.7 (21.4-30.0)         | <i>&lt;0.001</i> |                             |                          |                  |
| 55  | 21.3 (17.6-24.8)            | 23.1 (19.3-27.1)         | <i>&lt;0.001</i> |                             |                          |                  |
| 60  | 19.5 (16.3-22.8)            | 21.3 (17.8-24.7)         | <i>&lt;0.001</i> |                             |                          |                  |
| 70  | 16.2 (13.7-18.7)            | 17.2 (14.2-19.7)         | <i>0.003</i>     |                             |                          |                  |
| 80  | 15.0 (12.9-17.1)            | 15.7 (13.4-17.9)         | 0.007            |                             |                          |                  |
| 90  | 14.4 (12.5-16.5)            | 15.2 (13.0-17.2)         | 0.004            |                             |                          |                  |
| 100 | 14.1 (12.3-16.3)            | 15.0 (12.9-17.0)         | <i>0.002</i>     |                             |                          |                  |
| 110 | 14.0 (12.2-16.2)            | 15.0 (12.8-16.9)         | <i>0.001</i>     |                             |                          |                  |
| 130 | 13.9 (12.0-16.1)            | 14.9 (12.8-16.8)         | <i>&lt;0.001</i> |                             |                          |                  |
| 150 | 13.9 (11.9-16.1)            | 14.9 (12.7-16.8)         | <i>&lt;0.001</i> |                             |                          |                  |
| 170 | 13.9 (11.9-16.1)            | 14.9 (12.7-16.8)         | <i>&lt;0.001</i> |                             |                          |                  |
| 190 | 13.9 (11.8-16.1)            | 14.9 (12.7-16.9)         | <i>&lt;0.001</i> |                             |                          |                  |

Median of all SD's measured in all ROI's. Data shown as median (interquartile range), P-Value < 0.0033 shown in *Italics*
