# Supplementary material for: Optimal Conspicuity of Liver Metastases in Virtual Monochromatic Imaging Reconstructions on a Novel Photon-Counting Detector CT—Effect of keV Settings and BMI
Source: MDPI journal article supplement (doi:10.3390/diagnostics12051231), 2022-05-14
Supplement: s1 [file s1]

**Supplemental Table S4 Spearman Correlations between BMI, image noise, TLR and CNR**

|                     |     | PCD-CT |         | EID-CT |         |
|---------------------|-----|--------|---------|--------|---------|
| BMI and image noise | keV | rho    | P-Value | rho    | P-Value |
|                     | 40  | 0.281  | 0.006   | 0.252  | 0.011   |
|                     | 45  | 0.251  | 0.015   |        |         |
|                     | 50  | 0.232  | 0.025   |        |         |
|                     | 55  | 0.179  | 0.084   |        |         |
|                     | 60  | 0.121  | 0.244   |        |         |
|                     | 70  | 0.016  | 0.881   |        |         |
|                     | 80  | 0.116  | 0.264   |        |         |
|                     | 90  | 0.166  | 0.110   |        |         |
|                     | 100 | 0.207  | 0.045   |        |         |
|                     | 110 | 0.220  | 0.033   |        |         |
|                     | 130 | 0.250  | 0.015   |        |         |
|                     | 150 | 0.263  | 0.010   |        |         |
|                     | 170 | 0.268  | 0.009   |        |         |
|                     | 190 | 0.265  | 0.010   |        |         |
| BMI and TLR         | 40  | 0.083  | 0.581   | 0.023  | 0.876   |
|                     | 45  | 0.082  | 0.585   |        |         |
|                     | 50  | 0.070  | 0.641   |        |         |
|                     | 55  | 0.078  | 0.603   |        |         |
|                     | 60  | 0.101  | 0.500   |        |         |
|                     | 70  | 0.111  | 0.456   |        |         |
|                     | 80  | 0.136  | 0.363   |        |         |
|                     | 90  | 0.132  | 0.378   |        |         |
|                     | 100 | 0.145  | 0.330   |        |         |
|                     | 110 | 0.142  | 0.341   |        |         |
|                     | 130 | 0.131  | 0.380   |        |         |
|                     | 150 | 0.137  | 0.358   |        |         |
|                     | 170 | 0.140  | 0.350   |        |         |
|                     | 190 | 0.134  | 0.367   |        |         |
| BMI and CNR         | 40  | -0.232 | 0.116   | -0.399 | 0.004   |
|                     | 45  | -0.224 | 0.131   |        |         |
|                     | 50  | -0.217 | 0.142   |        |         |
|                     | 55  | -0.222 | 0.133   |        |         |
|                     | 60  | -0.191 | 0.197   |        |         |
|                     | 70  | -0.187 | 0.208   |        |         |
|                     | 80  | -0.216 | 0.145   |        |         |
|                     | 90  | -0.237 | 0.108   |        |         |
|                     | 100 | -0.219 | 0.139   |        |         |
|                     | 110 | -0.223 | 0.131   |        |         |
|                     | 130 | -0.254 | 0.085   |        |         |
|                     | 150 | -0.275 | 0.061   |        |         |
|                     | 170 | -0.270 | 0.066   |        |         |
|                     | 190 | -0.255 | 0.084   |        |         |

Significant P-Value < 0.0033 shown in *Italics*.
