# Supplementary material for: Optimal Conspicuity of Liver Metastases in Virtual Monochromatic Imaging Reconstructions on a Novel Photon-Counting Detector CT—Effect of keV Settings and BMI
Source: MDPI journal article supplement (doi:10.3390/diagnostics12051231), 2022-05-14
Supplement: s1 [file s1]

**Table S1** ROI measurements / Summary Raw Data

| <b>PCD-CT</b> |                  |                         |                   |
|---------------|------------------|-------------------------|-------------------|
| <b>keV</b>    | <b>Location</b>  | <b>Mean (HU)</b>        | <b>SD (HU)</b>    |
| 40            | Liver metastases | 108.8 [72.9; 173.1]     | 33.9 [29.8; 37.4] |
|               | Liver parenchyma | 311.6 [261.1; 360.9]    | 31.1 [28.3; 36.3] |
|               | VCI              | 546.2 [456.1; 617.3]    | 36.9 [30.4; 41.8] |
|               | Aorta            | 579.1 [518.9; 656.4]    | 30.7 [26.7; 36.1] |
|               | Portal vein      | 657.7 [605.9; 740.7]    | 39.9 [34.9; 48.8] |
|               | Spleen           | 420.2 [375.7; 489.1]    | 33.1 [29.4; 37.1] |
|               | Renal cortex     | 687.9 [609.2; 738.1]    | 37.5 [33.1; 50.5] |
|               | Muscle           | 98.6 [86.7; 113.8]      | 30.2 [27.3; 32.8] |
|               | Subcutaneous     | -156.8 [-171.5; -125.8] | 26.2 [23.1; 31.0] |
|               | Air              | -998.4 [-999.9; -996.4] | 17.1 [14.9; 20.1] |
| 45            | Liver metastases | 92.5 [62.7; 145.4]      | 30.1 [26.8; 33.1] |
|               | Liver parenchyma | 258.1 [220.3; 297.5]    | 27.8 [25.1; 32.4] |
|               | VCI              | 443.2 [371.0; 492.9]    | 32.5 [26.8; 37.0] |
|               | Aorta            | 464.5 [421.8; 534.7]    | 27.2 [23.6; 31.2] |
|               | Portal vein      | 534.9 [496.1; 600.3]    | 35.4 [31.0; 40.6] |
|               | Spleen           | 341.9 [309.3; 397.6]    | 29.4 [26.0; 32.3] |
|               | Renal cortex     | 549.9 [496.9; 598.6]    | 32.8 [28.2; 42.9] |
|               | Muscle           | 87.2 [76.4; 100.3]      | 26.6 [24.5; 29.1] |
|               | Subcutaneous     | -139.6 [-152.4; -113.8] | 23.7 [20.6; 27.6] |
|               | Air              | -998.6 [-999.7; -997.1] | 15.3 [13.4; 17.9] |
| 50            | Liver metastases | 79.9 [57.3; 123.6]      | 27.1 [24.3; 29.9] |
|               | Liver parenchyma | 219.1 [188.3; 252.4]    | 25.3 [22.7; 28.9] |
|               | VCI              | 365.4 [304.1; 414.7]    | 28.2 [24.5; 33.1] |
|               | Aorta            | 385.4 [347.3; 440.1]    | 24.3 [21.5; 27.8] |
|               | Portal vein      | 437.5 [407.5; 493.9]    | 31.2 [27.9; 36.1] |
|               | Spleen           | 286.8 [257.3; 332.9]    | 26.4 [23.4; 29.1] |
|               | Renal cortex     | 451.9 [403.3; 491.7]    | 29.9 [25.2; 37.2] |
|               | Muscle           | 78.2 [69.9; 89.8]       | 24.2 [22.1; 26.8] |
|               | Subcutaneous     | -127.4 [-138.1; -104.0] | 21.5 [18.6; 24.9] |
|               | Air              | -998.7 [-999.5; -997.6] | 13.8 [12.0; 16.3] |
| 55            | Liver metastases | 69.6 [50.7; 103.7]      | 24.3 [22.1; 27.0] |
|               | Liver parenchyma | 188.1 [162.6; 213.4]    | 22.7 [20.4; 26.0] |
|               | VCI              | 304.3 [253.5; 336.5]    | 25.4 [21.7; 29.5] |
|               | Aorta            | 319.1 [288.3; 364.4]    | 21.8 [19.6; 25.2] |
|               | Portal vein      | 362.4 [339.5; 412.1]    | 27.7 [25.2; 32.8] |
|               | Spleen           | 240.3 [216.7; 275.7]    | 23.8 [21.4; 26.6] |
|               | Renal cortex     | 372.5 [334.2; 405.5]    | 27.1 [22.5; 33.1] |
|               | Muscle           | 71.4 [63.8; 81.5]       | 22.1 [19.9; 24.1] |
|               | Subcutaneous     | -118.3 [-125.9; -96.4]  | 19.7 [16.9; 22.7] |
|               | Air              | -998.8 [-999.5; -997.8] | 12.5 [10.8; 14.7] |
| 60            | Liver metastases | 61.2 [44.5; 89.5]       | 22.2 [20.0; 24.5] |
|               | Liver parenchyma | 163.7 [142.7; 183.4]    | 20.8 [18.6; 23.6] |
|               | VCI              | 257.6 [215.9; 284.8]    | 22.6 [19.2; 26.9] |
|               | Aorta            | 267.4 [242.4; 307.8]    | 20.0 [17.7; 22.9] |
|               | Portal vein      | 304.6 [286.7; 348.7]    | 25.4 [22.5; 29.7] |
|               | Spleen           | 204.7 [185.9; 233.6]    | 21.7 [19.5; 24.6] |
|               | Renal cortex     | 311.2 [281.8; 339.9]    | 25.0 [19.8; 29.4] |
|               | Muscle           | 66.4 [59.9; 75.3]       | 20.0 [17.9; 22.6] |
|               | Subcutaneous     | -110.2 [-117.2; -90.7]  | 18.3 [15.7; 20.6] |

|     |                  |                         |                   |
|-----|------------------|-------------------------|-------------------|
|     | Air              | -998.7 [-999.4; -998.1] | 11.2 [9.7; 13.0]  |
| 70  | Liver metastases | 51.9 [38.4; 70.7]       | 18.2 [16.3; 20.2] |
|     | Liver parenchyma | 127.1 [114.9; 142.5]    | 17.1 [15.2; 18.8] |
|     | VCI              | 189.9 [159.7; 206.5]    | 18.3 [16.1; 20.6] |
|     | Aorta            | 197.4 [178.3; 227.6]    | 15.7 [13.9; 18.3] |
|     | Portal vein      | 222.0 [206.1; 257.9]    | 20.4 [17.8; 23.5] |
|     | Spleen           | 155.3 [141.0; 170.1]    | 17.4 [16.1; 19.6] |
|     | Renal cortex     | 225.0 [206.4; 247.3]    | 20.1 [15.9; 22.6] |
|     | Muscle           | 59.3 [53.4; 66.0]       | 16.9 [14.4; 18.8] |
|     | Subcutaneous     | -99.1 [-105.0; -82.5]   | 15.4 [13.3; 17.0] |
|     | Air              | -998.9 [-999.4; -998.4] | 9.3 [7.9; 11.3]   |
| 80  | Liver metastases | 47.3 [35.0; 61.2]       | 16.7 [14.9; 18.4] |
|     | Liver parenchyma | 104.9 [96.4; 116.2]     | 15.7 [14.2; 17.5] |
|     | VCI              | 146.2 [125.9; 157.5]    | 16.1 [14.5; 17.7] |
|     | Aorta            | 151.9 [138.1; 174.7]    | 14.5 [13.1; 16.9] |
|     | Portal vein      | 168.4 [156.3; 197.2]    | 18.7 [16.2; 21.0] |
|     | Spleen           | 122.6 [112.7; 132.5]    | 16.1 [14.6; 17.7] |
|     | Renal cortex     | 169.9 [157.0; 186.1]    | 17.2 [14.9; 20.4] |
|     | Muscle           | 54.1 [49.6; 60.3]       | 15.9 [13.8; 17.6] |
|     | Subcutaneous     | -91.2 [-96.7; -76.8]    | 14.5 [12.6; 15.9] |
|     | Air              | -999.0 [-999.5; -998.4] | 9.2 [8.0; 10.9]   |
| 90  | Liver metastases | 43.8 [31.9; 55.5]       | 16.0 [14.2; 17.6] |
|     | Liver parenchyma | 90.6 [83.2; 100.1]      | 15.3 [13.8; 17.2] |
|     | VCI              | 115.3 [102.9; 125.6]    | 15.1 [13.9; 16.9] |
|     | Aorta            | 121.3 [112.3; 139.4]    | 14.3 [12.8; 16.4] |
|     | Portal vein      | 133.8 [123.9; 157.3]    | 17.7 [15.8; 20.1] |
|     | Spleen           | 101.7 [93.9; 111.1]     | 15.8 [14.3; 17.2] |
|     | Renal cortex     | 133.0 [122.3; 144.3]    | 16.1 [14.4; 19.1] |
|     | Muscle           | 50.9 [46.4; 55.7]       | 15.5 [13.7; 17.2] |
|     | Subcutaneous     | -86.0 [-91.2; -73.2]    | 13.8 [12.5; 15.5] |
|     | Air              | -999.0 [-999.6; -998.3] | 9.0 [8.0; 10.7]   |
| 100 | Liver metastases | 41.0 [29.7; 51.8]       | 15.7 [13.9; 17.3] |
|     | Liver parenchyma | 81.7 [74.4; 87.9]       | 15.2 [13.6; 17.1] |
|     | VCI              | 94.5 [86.9; 104.4]      | 14.8 [13.7; 16.9] |
|     | Aorta            | 101.1 [91.9; 115.0]     | 14.3 [12.8; 16.1] |
|     | Portal vein      | 109.8 [100.6; 128.2]    | 17.2 [15.6; 19.8] |
|     | Spleen           | 86.2 [80.9; 96.3]       | 15.6 [14.1; 17.0] |
|     | Renal cortex     | 107.4 [99.4; 117.3]     | 15.7 [13.7; 18.3] |
|     | Muscle           | 49.1 [43.7; 52.1]       | 15.5 [13.6; 17.1] |
|     | Subcutaneous     | -82.5 [-87.7; -70.6]    | 13.5 [12.2; 15.3] |
|     | Air              | -999.1 [-999.7; -998.3] | 9.1 [8.0; 10.6]   |
| 110 | Liver metastases | 39.6 [27.6; 48.4]       | 15.5 [13.8; 17.0] |
|     | Liver parenchyma | 74.1 [67.5; 79.2]       | 15.1 [13.5; 17.0] |
|     | VCI              | 81.3 [73.6; 89.4]       | 14.6 [13.5; 16.9] |
|     | Aorta            | 86.7 [79.5; 98.1]       | 14.2 [13.0; 16.0] |
|     | Portal vein      | 92.5 [84.8; 106.8]      | 17.1 [15.4; 19.7] |
|     | Spleen           | 75.6 [71.7; 84.2]       | 15.5 [14.0; 16.9] |
|     | Renal cortex     | 89.9 [83.0; 98.7]       | 15.5 [13.4; 18.0] |
|     | Muscle           | 47.6 [42.1; 50.0]       | 15.5 [13.5; 16.9] |
|     | Subcutaneous     | -80.2 [-85.0; -68.9]    | 13.4 [12.1; 15.0] |
|     | Air              | -999.1 [-999.7; -998.2] | 9.1 [8.0; 10.6]   |
| 130 | Liver metastases | 36.3 [25.2; 44.5]       | 15.5 [13.6; 17.1] |

|               |                  |                           |                   |
|---------------|------------------|---------------------------|-------------------|
|               | Liver parenchyma | 65.5 [59.4; 70.3]         | 14.9 [13.5; 16.9] |
|               | VCI              | 63.2 [56.3; 69.8]         | 14.6 [13.3; 16.9] |
|               | Aorta            | 67.8 [61.9; 76.9]         | 14.3 [12.9; 16.0] |
|               | Portal vein      | 71.2 [64.0; 82.4]         | 17.0 [15.3; 19.5] |
|               | Spleen           | 62.0 [58.8; 68.3]         | 15.4 [14.0; 17.0] |
|               | Renal cortex     | 66.9 [60.4; 74.4]         | 15.4 [13.2; 17.8] |
|               | Muscle           | 45.6 [40.9; 47.9]         | 15.5 [13.5; 16.8] |
|               | Subcutaneous     | -76.7 [-81.8; -66.8]      | 13.2 [11.9; 14.8] |
|               | Air              | -999.1 [-999.8; -998.2]   | 9.1 [8.0; 10.6]   |
| 150           | Liver metastases | 34.1 [24.4; 42.2]         | 15.4 [13.5; 17.0] |
|               | Liver parenchyma | 60.0 [54.3; 65.2]         | 14.9 [13.5; 16.9] |
|               | VCI              | 52.9 [46.3; 59.8]         | 14.5 [13.2; 16.8] |
|               | Aorta            | 56.6 [51.7; 65.4]         | 14.3 [12.9; 15.9] |
|               | Portal vein      | 58.7 [51.6; 69.2]         | 17.0 [15.4; 19.3] |
|               | Spleen           | 54.8 [51.4; 60.0]         | 15.5 [14.1; 17.0] |
|               | Renal cortex     | 53.3 [47.8; 60.7]         | 15.2 [13.3; 17.7] |
|               | Muscle           | 43.8 [40.1; 46.8]         | 15.5 [13.4; 16.9] |
|               | Subcutaneous     | -75.0 [-80.0; -65.5]      | 13.1 [11.9; 14.7] |
|               | Air              | -999.1 [-999.9; -998.2]   | 9.1 [8.0; 10.6]   |
| 170           | Liver metastases | 33.3 [24.1; 40.6]         | 15.4 [13.5; 16.9] |
|               | Liver parenchyma | 56.7 [51.5; 62.0]         | 14.9 [13.5; 16.9] |
|               | VCI              | 46.6 [40.5; 52.3]         | 14.5 [13.2; 16.9] |
|               | Aorta            | 50.1 [45.0; 57.7]         | 14.3 [12.8; 16.0] |
|               | Portal vein      | 50.8 [43.3; 60.5]         | 17.0 [15.3; 19.2] |
|               | Spleen           | 50.0 [46.9; 54.9]         | 15.6 [14.1; 17.0] |
|               | Renal cortex     | 45.3 [39.3; 51.7]         | 15.2 [13.3; 17.7] |
|               | Muscle           | 42.8 [39.2; 46.1]         | 15.5 [13.4; 16.9] |
|               | Subcutaneous     | -74.1 [-78.9; -64.6]      | 13.1 [11.8; 14.7] |
|               | Air              | -999.1 [-999.9; -998.2]   | 9.1 [8.0; 10.7]   |
| 190           | Liver metastases | 32.7 [23.8; 39.5]         | 15.3 [13.4; 16.9] |
|               | Liver parenchyma | 54.4 [49.0; 60.0]         | 14.9 [13.4; 16.9] |
|               | VCI              | 42.2 [37.5; 47.9]         | 14.4 [13.1; 17.0] |
|               | Aorta            | 45.7 [41.3; 52.4]         | 14.3 [12.9; 16.0] |
|               | Portal vein      | 46.0 [38.1; 54.7]         | 16.9 [15.3; 19.2] |
|               | Spleen           | 47.2 [44.0; 51.5]         | 15.6 [14.1; 17.0] |
|               | Renal cortex     | 40.0 [34.1; 46.3]         | 15.2 [13.4; 17.7] |
|               | Muscle           | 42.4 [38.6; 45.5]         | 15.5 [13.4; 16.8] |
|               | Subcutaneous     | -73.4 [-78.2; -64.1]      | 13.0 [11.7; 14.7] |
|               | Air              | -999.1 [-1000.0; -998.2]  | 9.1 [8.0; 10.6]   |
| <b>EID-CT</b> |                  |                           |                   |
|               | Liver metastases | 46.2 [32.4; 70.1]         | 19.2 [16.5; 22.1] |
|               | Liver parenchyma | 122.1 [108.4; 140.6]      | 18.2 [15.8; 22.6] |
|               | VCI              | 169.8 [148.3; 213.1]      | 18.9 [15.5; 22.6] |
|               | Aorta            | 172.5 [146.7; 203.9]      | 14.8 [12.9; 19.1] |
|               | Portal vein      | 201.4 [173.8; 234.9]      | 19.6 [16.7; 23.0] |
|               | Spleen           | 136.8 [123.5; 156.6]      | 19.4 [16.6; 23.3] |
|               | Renal cortex     | 195.5 [163.1; 216.1]      | 20.9 [17.7; 24.5] |
|               | Muscle           | 52.7 [48.9; 58.4]         | 19.4 [15.9; 22.4] |
|               | Subcutaneous     | -108.2 [-113.7; -86.1]    | 17.1 [14.6; 20.6] |
|               | Air              | -1000.0 [-1000.9; -998.8] | 9.5 [7.9; 11.8]   |

Data shown as median [interquartile range].
